# Supplementary material
Source: PubMed Central journal article supplement (PMC2736804)
Supplement: NIHMS120752-supplement-03.pdf [file NIHMS120752-supplement-03.pdf]

Supplemental Figure 2

A

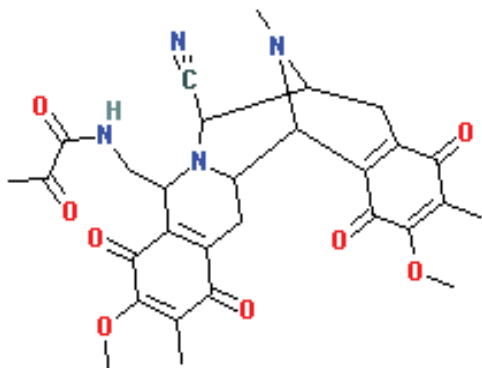

Saframycin A

NSC325663

Formula: C<sub>29</sub>H<sub>30</sub>N<sub>4</sub>O<sub>8</sub>

B

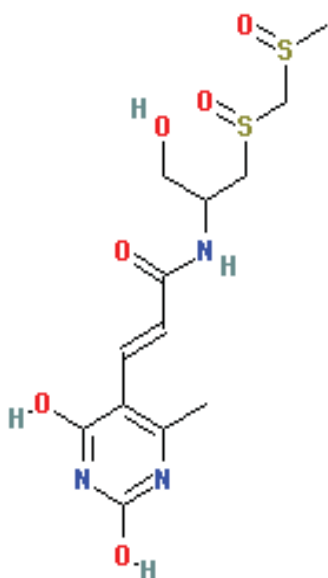

Sparoxomycin A1:

NSC251819

Formula: C<sub>13</sub>H<sub>19</sub>N<sub>3</sub>O<sub>6</sub>S<sub>2</sub>

C

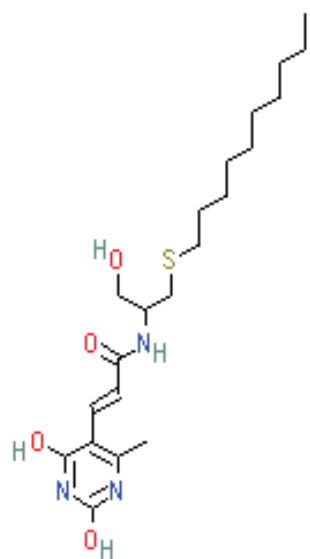

NSC265473

Formula: C<sub>21</sub>H<sub>35</sub>N<sub>3</sub>O<sub>4</sub>S
