# Supplementary material
Source: PubMed Central journal article supplement (PMC2736804)

Supplemental Figure 1

Intraclass correlation vs. normalization method based on cell lines

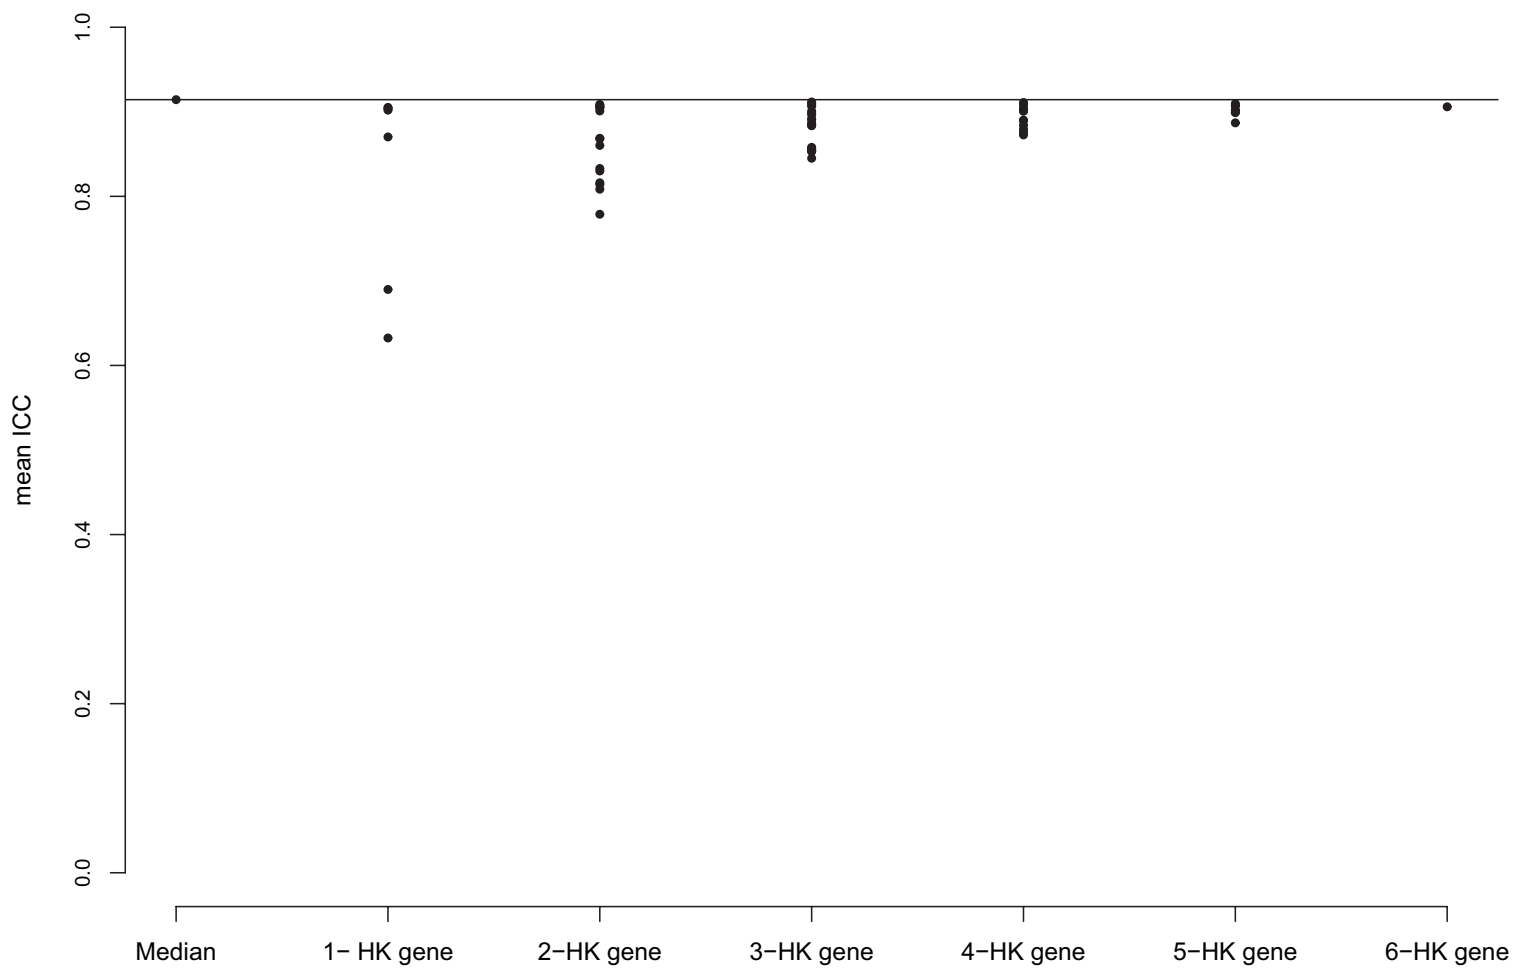

Supplement: NIHMS120752-supplement-02.pdf [file NIHMS120752-supplement-02.pdf]
